# Supplementary material for: Cost effective perovskite solar cells with a high efficiency and open-circuit voltage based on a perovskite-friendly carbon electrode
Source: Royal Society of Chemistry journal article supplement (doi:10.1039/c7ta10871k), 2018-01-01
Supplement: c7ta10871k1.pdf [file c7ta10871k1.pdf]

*Supplementary information*

**Cost-effective perovskite solar cells with a high efficiency and open-circuit voltage based on the perovskite -friendly carbon electrode**

*Qian-Qian Chu,<sup>†</sup> Bin Ding,<sup>†</sup> Qi Qiu,<sup>‡</sup> Yan Liu,<sup>†</sup> Cheng-Xin Li,<sup>†</sup> Chang-Jiu Li,<sup>†</sup>*

*Guan-Jun Yang<sup>\*,†</sup> and Baizeng Fang<sup>\*,§</sup>*

*<sup>†</sup> State Key Laboratory for Mechanical Behavior of Materials, School of Materials Science and Engineering, Xi'an Jiaotong University, Xi'an, Shaanxi, 710049, P. R. China. \*E-mail: ygj@mail.xjtu.edu.cn (G.-J. Yang)*

*<sup>‡</sup>College of Chemistry and Environmental Engineering, Shenzhen University, Shenzhen, Guangdong, 518060, P. R. China.*

*<sup>§</sup>Department of Chemical & Biological Engineering, University of British Columbia, 2360 East Mall, Vancouver, B.C. V6T 1Z3, Canada. E-mail: bfang@chbe.ubc.ca (B. Fang).*

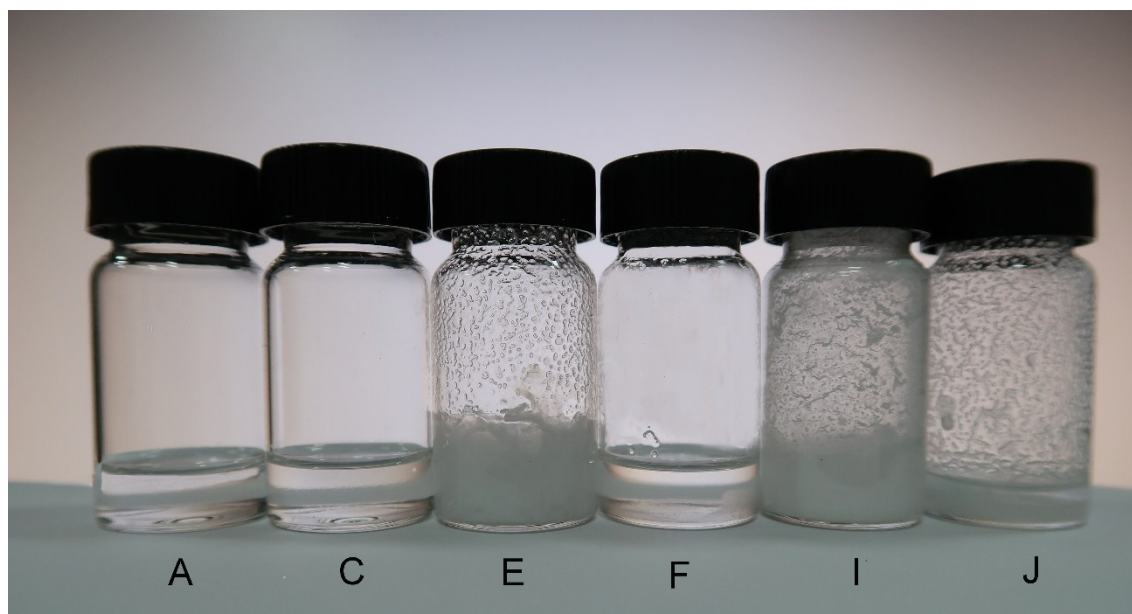

**Figure S1.** The dissolution of the binder (polyacrylic resin) in different solvents: A) PGMEA; C) EBAC; E) isopropanol; F) terpineol; I) cyclohexane and J: hexane.

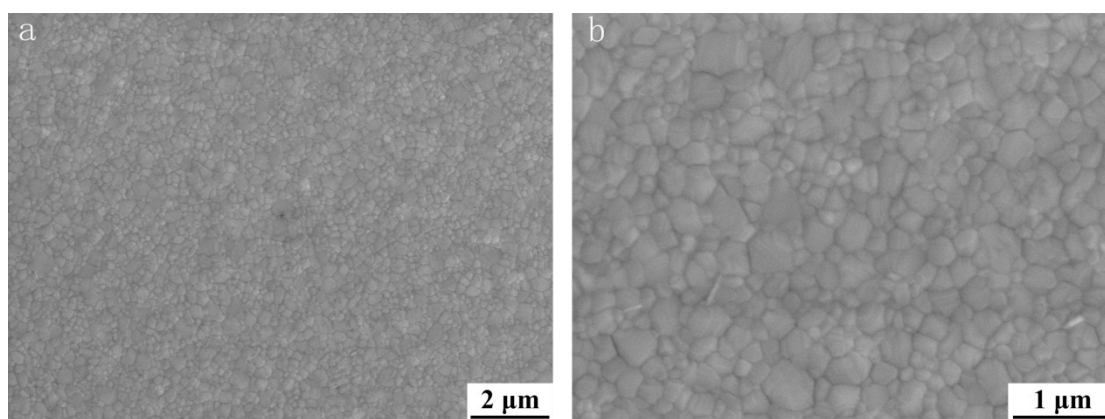

**Figure S2.** SEM images for a representative perovskite film on FTO/c-TiO<sub>2</sub>/m-TiO<sub>2</sub> substrate.

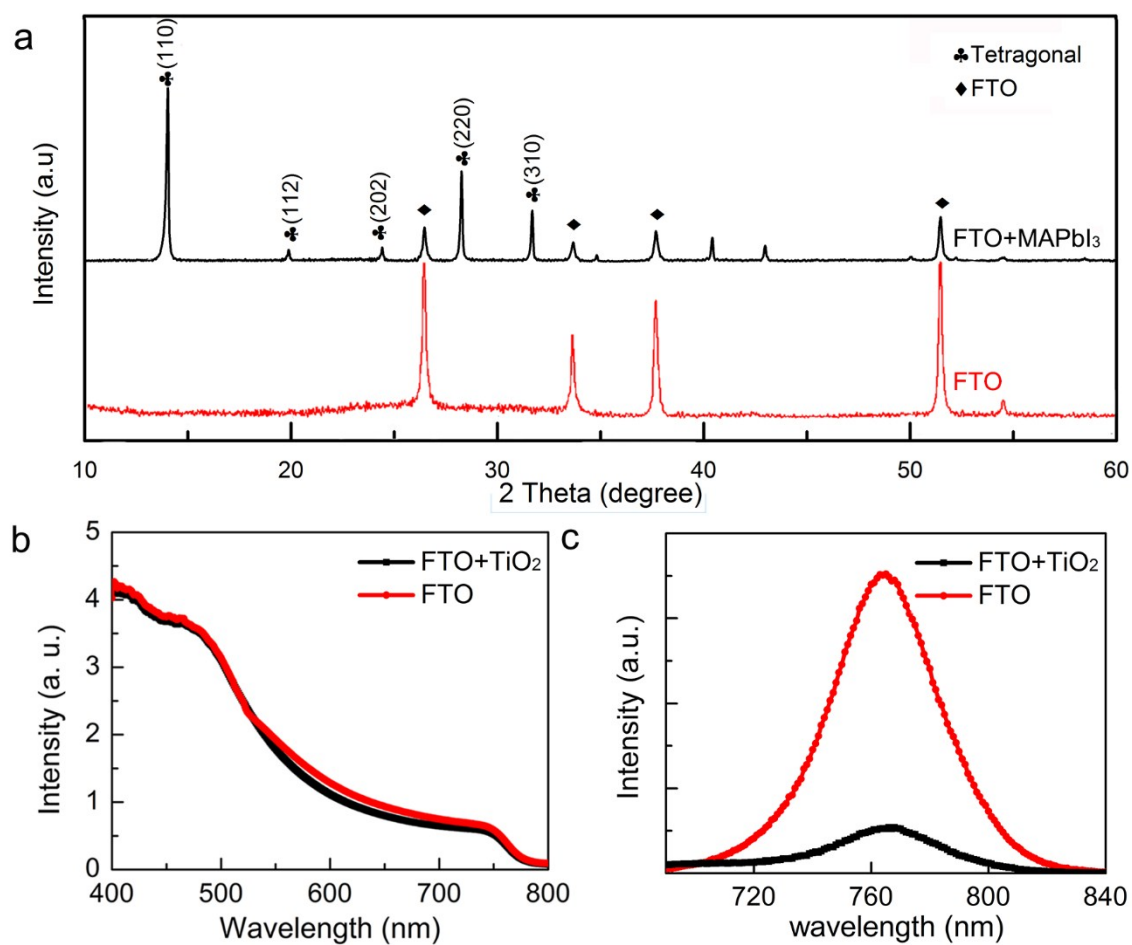

**Figure S3.** a) Representative XRD patterns of the perovskite film. b) UV-vis absorption spectra and c) the PL emission spectra of the perovskite film on the FTO and FTO/TiO<sub>2</sub> substrates.

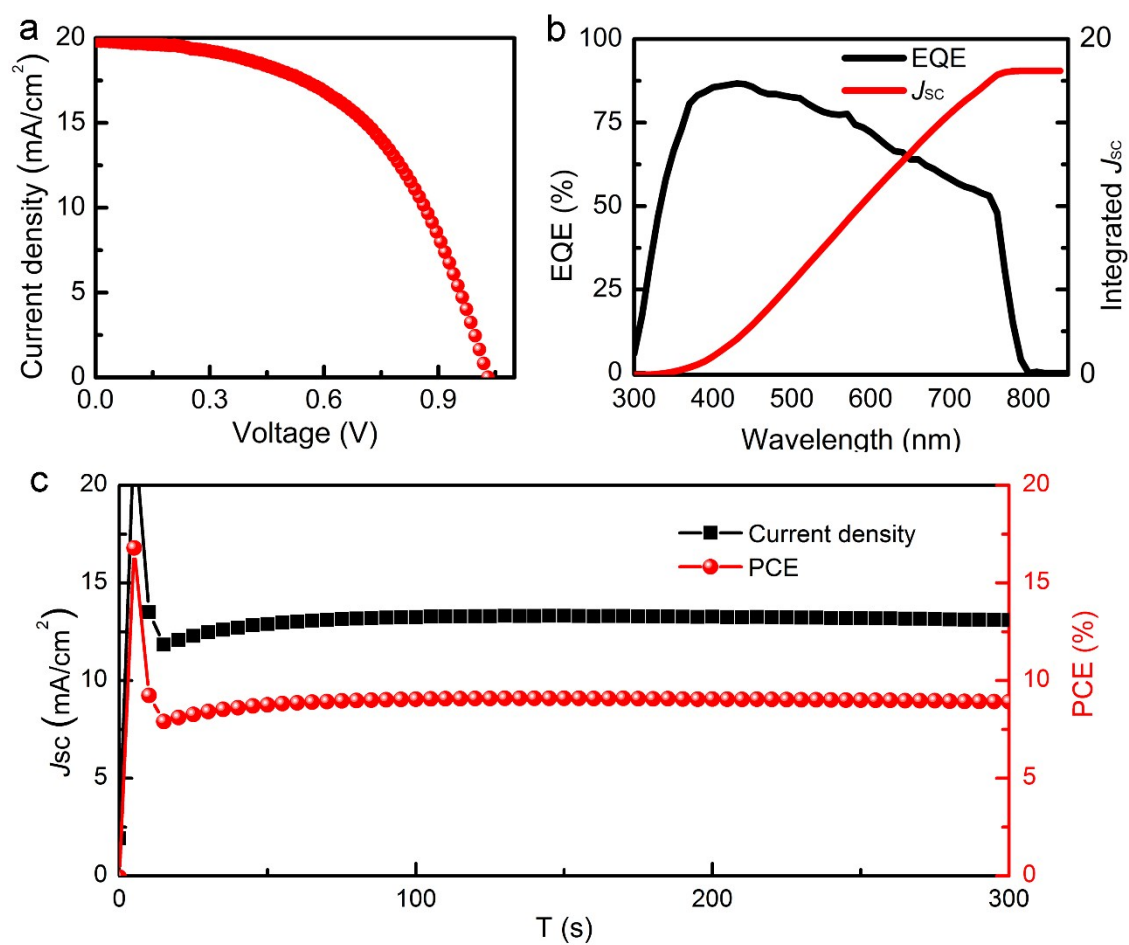

**Figure S4.** a)  $J$ - $V$  curve, b) the corresponding EQE and c) the corresponding steady-state output conversion efficiency data at the maximum power point of the carbon based PSC with PGMEA as the solvents of carbon paste.

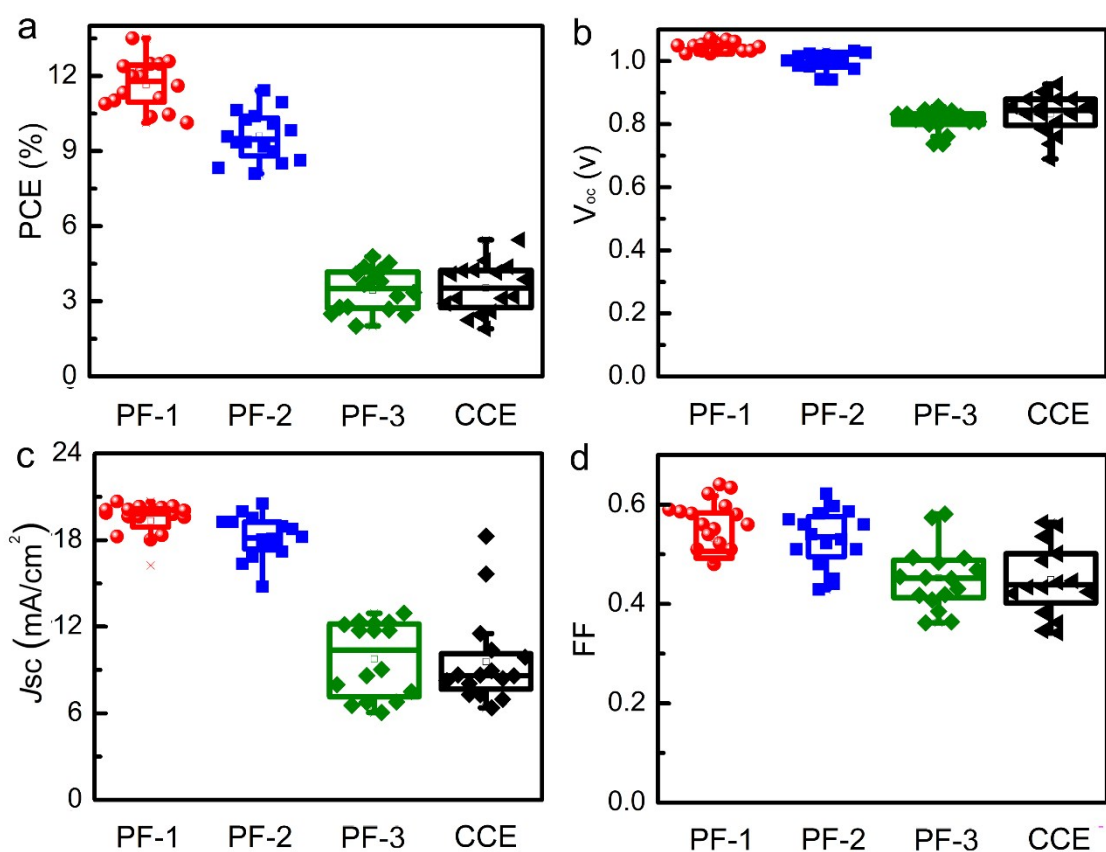

**Figure S5.** a) The PCE, b) the open circuit voltage ( $V_{oc}$ ), c) the short circuit current density ( $J_{sc}$ ) and d) fill factor (FF) of the as-constructed 16 carbon based perovskite solar cells with the four kinds of carbon electrodes.

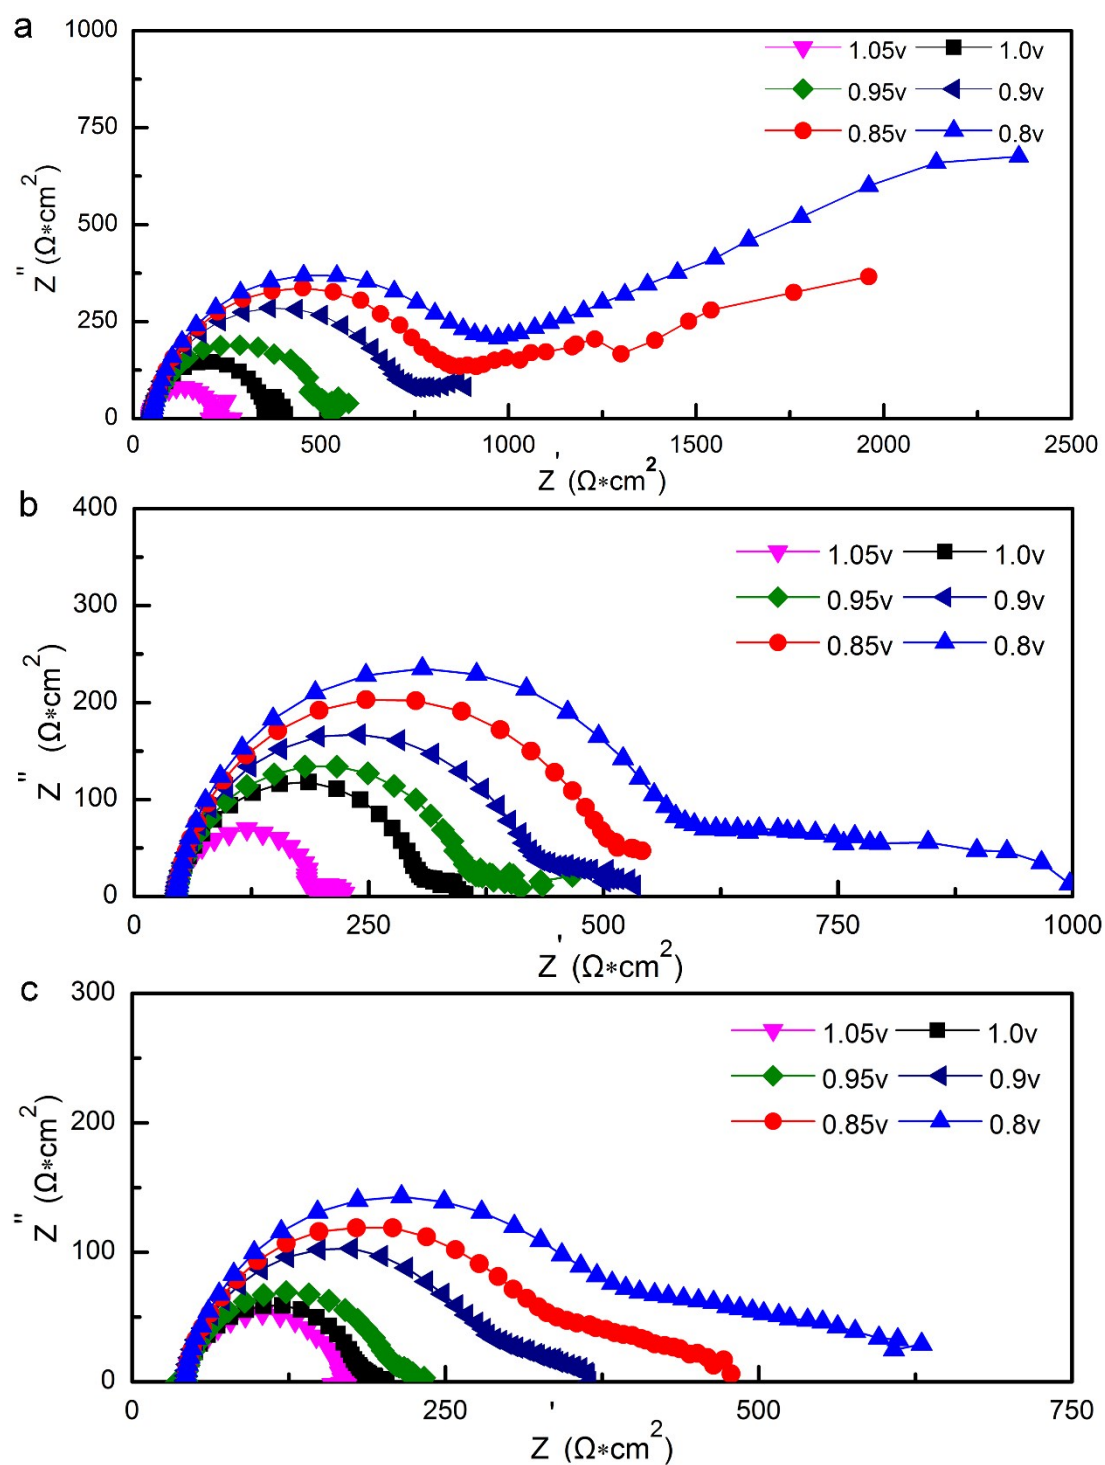

**Figure S6** Nyquist plots at various bias voltages for the device based a) PF-2, b) PF-3, c) CCE

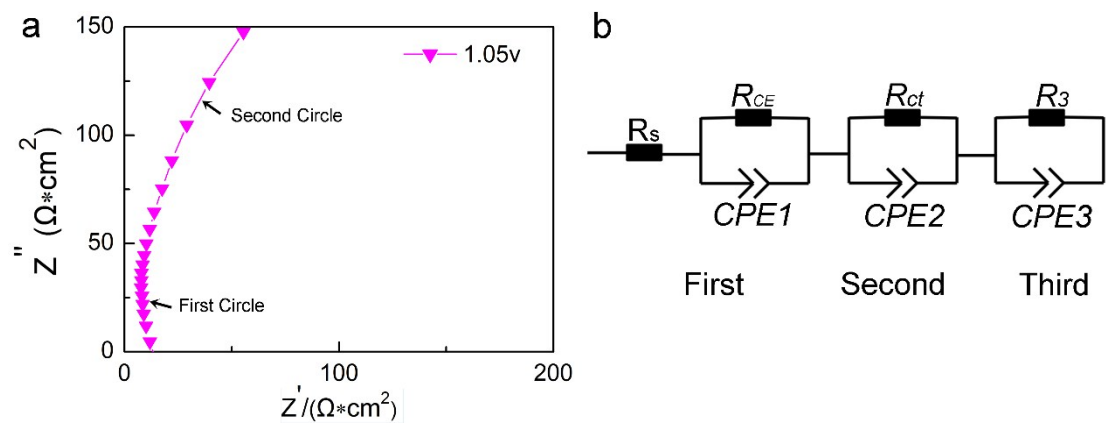

**Figure S7** a) Nyquist plots of PF-1 in high frequency, b) the corresponding equivalent circuits of the Nyquist plots of the PSCs.



**Table S1.** Solar cell parameters of the four as-fabricated carbon-based perovskite solar cells.

| Cell | Scan         | PCE (%) | $V_{oc}$ (v) | $J_{sc}$ (mA/cm <sup>2</sup> ) | $FF$ |
|------|--------------|---------|--------------|--------------------------------|------|
| PF-1 | Reverse scan | 13.5    | 1.05         | 20.25                          | 0.63 |
|      | Forward scan | 12.5    | 1.01         | 20.01                          | 0.62 |
| PF-2 | Reverse scan | 11.2    | 1.02         | 19.90                          | 0.55 |
|      | Forward scan | 10.0    | 1.03         | 18.69                          | 0.52 |
| PF-3 | Reverse scan | 4.77    | 0.73         | 18.20                          | 0.36 |
|      | Forward scan | 2.37    | 0.59         | 13.03                          | 0.31 |
| CCE  | Reverse scan | 5.26    | 0.93         | 11.73                          | 0.48 |
|      | Forward scan | 3.04    | 0.86         | 10.46                          | 0.34 |
